# Supplementary material for: Spatially resolved analysis of glycolipids and metabolites in living Synechococcus sp. PCC 7002 using nanospray desorption electrospray ionization
Source: Royal Society of Chemistry journal article supplement (doi:10.1039/c3an36716a), 2013-01-01

## Electronic Supplementary Information for Analyst

### **Spatially-Resolved Analysis of Glycolipids and Metabolites in Living *Synechococcus* sp. PCC 7002 Using Nanospray Desorption Electrospray Ionization**

*Ingela Lanekoff<sup>1\*</sup>, Oleg Geydebrekht<sup>2</sup>, Grigoriy E. Pinchuk<sup>2</sup>, Allan E. Konopka<sup>2</sup>, Julia Laskin<sup>1\*</sup>*

<sup>1</sup>*Chemical and Materials Sciences Division, Pacific Northwest National Laboratory,  
Richland, Washington 99352, United States*

<sup>2</sup>*Biological Sciences Division, Pacific Northwest National Laboratory,  
Richland, Washington 99352, United States*

#### **Supplementary Figures**

**Figure S1:** Line scan of glucosylglycerol on agar for 72 hours (red trace) and 144 hours (blue trace) from Figure 4. For technical replicates data from a second line scan have been overlaid, this data is shown in black.

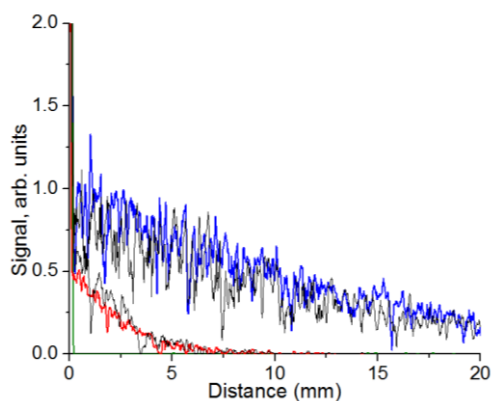

**Figure S2:** Line scan of sucrose on agar for 72 hours (red trace) and 144 hours (blue trace) from Figure 4. For technical replicates data from a second line scan have been overlaid, this data is shown in black.

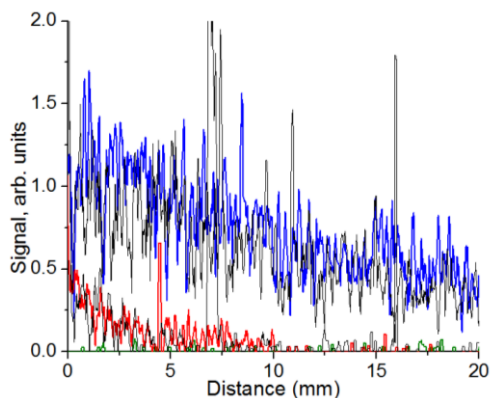

Supplement: c3an36716a.pdf [file c3an36716a.pdf]
